# Supplementary material for: ELAVL1 primarily couples mRNA stability with the 3′ UTRs of interferon-stimulated genes
Source: PubMed Central journal article supplement — Cell Rep. Author manuscript; Available in PMC 2021 Jun 24. (PMC8225249; doi:10.1016/j.celrep.2021.109178), 2021-05-25
Supplement: NIHMS1708606-supplement-1.pdf [file NIHMS1708606-supplement-1.pdf]

**Cell Reports, Volume 35**

**Supplemental information**

**ELAVL1 primarily couples mRNA stability  
with the 3' UTRs of interferon-stimulated genes**

**Katherine Rothamel, Sarah Arcos, Byungil Kim, Clara Reasoner, Samantha Lisy, Neelanjan Mukherjee, and Manuel Ascano**

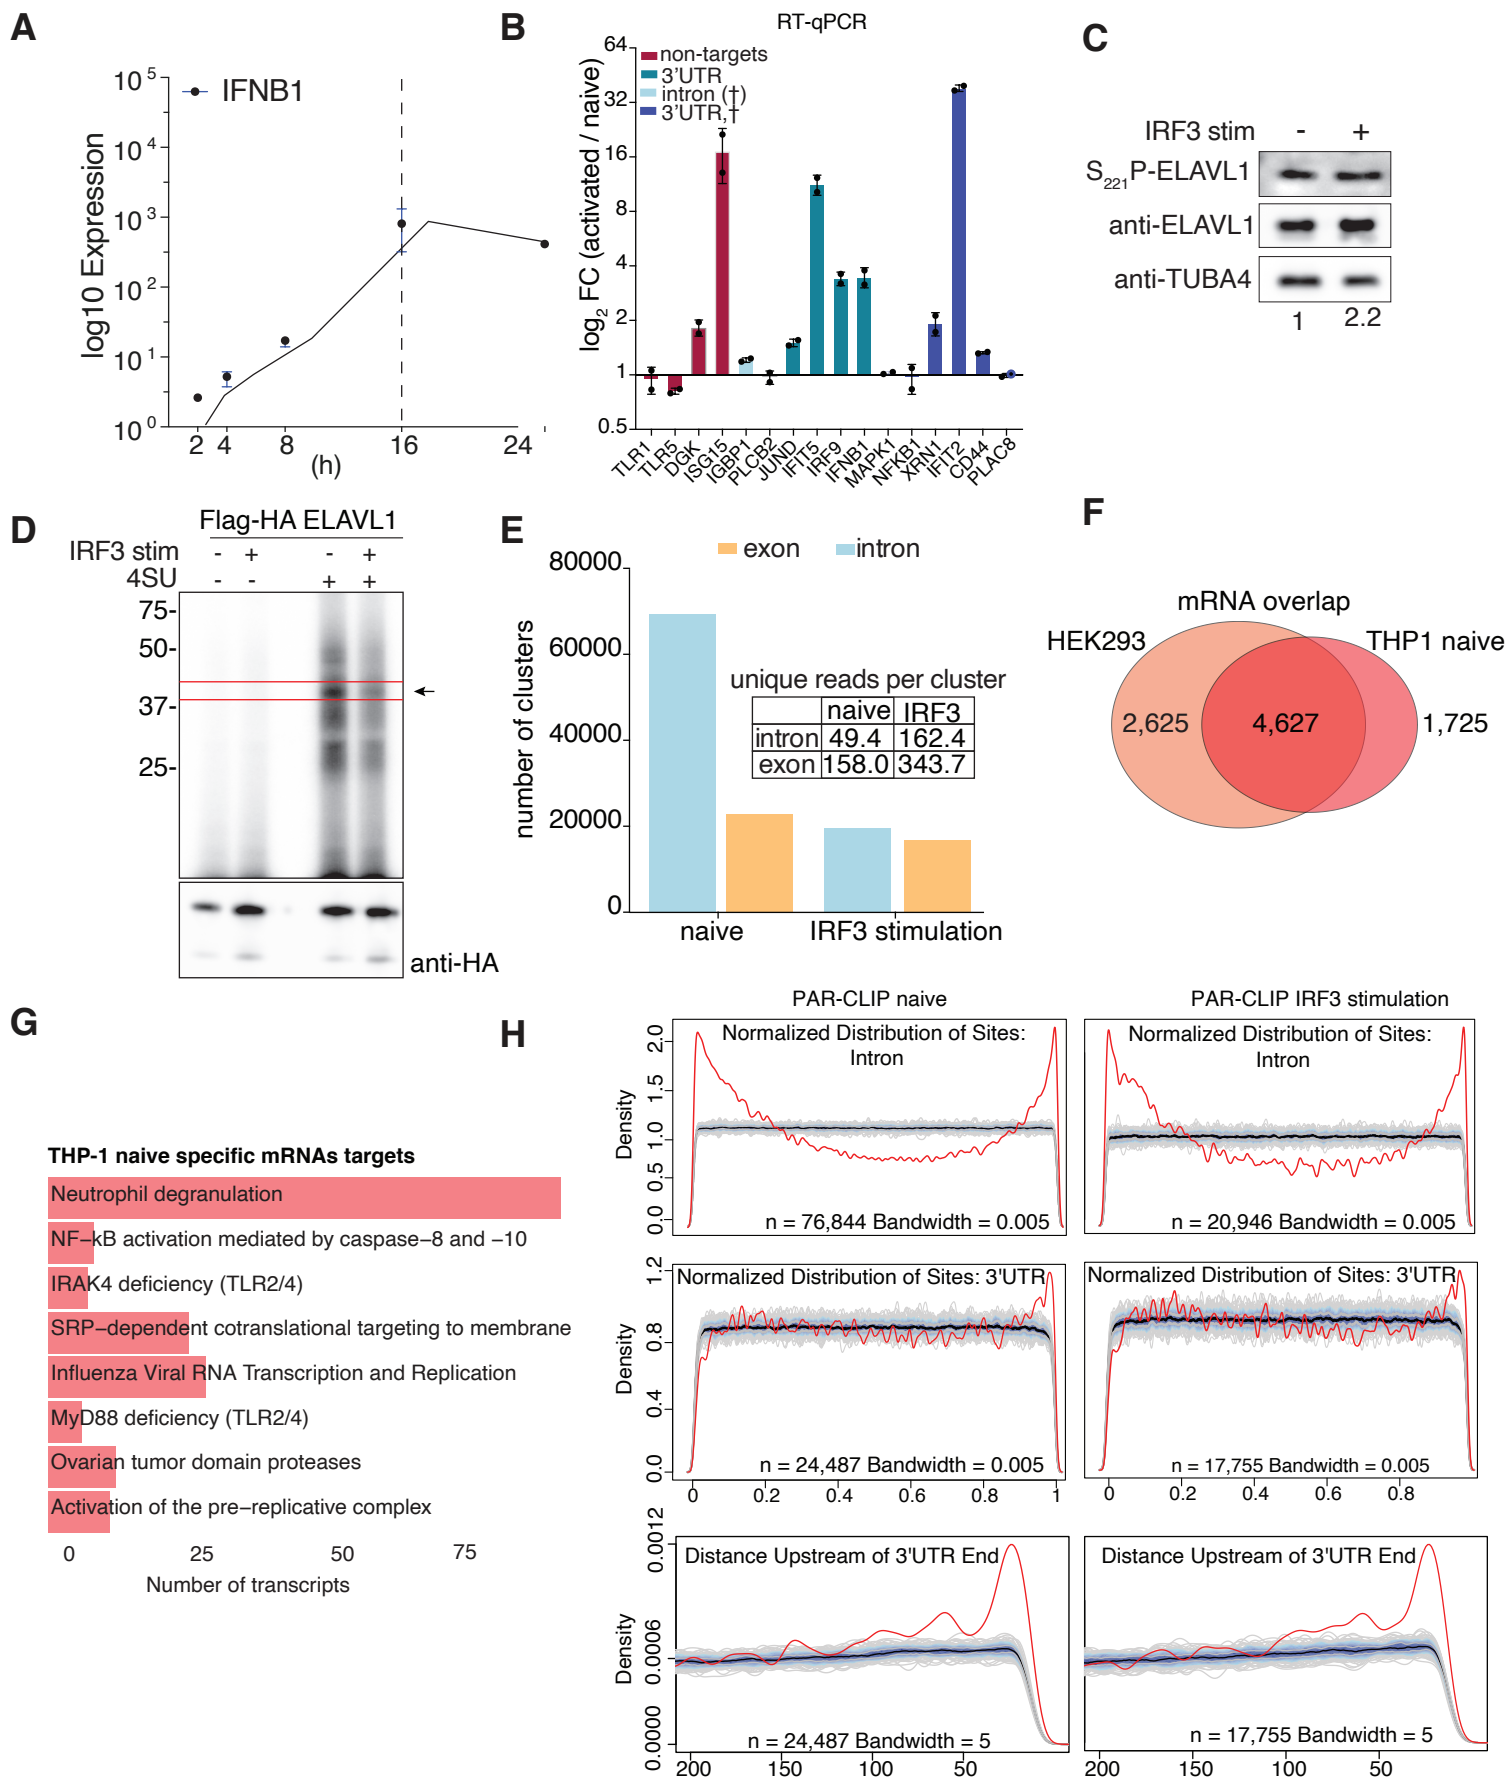

**Supplemental Figure 1: PAR-CLIP identifies and maps the cell-type-specific and condition-specific binding sites of ELAVL1, Related to Figure 1**

(A). THP-1 cells were stimulated with the STING agonist cGAMP (EC50), and RNA was collected at indicated time points. RT-qPCR was used to measure the mRNA levels of *IFNB1*. (B) Bar graph of the  $\log_2$  foldchange of mRNA levels (RT-qPCR) in immune activated cells compared to naive. (C) Immunoblot shows the whole-cell amount of phosphoserine (S221) ELAVL1 and ELAVL1 in both naive and immune activated cells. (D) Phosphoimage showing both the non-crosslinked (no 4SU) and crosslinked ELAVL1 to RNA samples of the IP for PAR-CLIP. Immunoblot shows that equal amounts of immunoprecipitated ELAVL1 from each condition. (E) Bar graph showing the number of clusters that mapped either to exons and introns across the two cellular conditions. Inset shows the average number of unique reads for each exonic- or intronic- cluster across the cellular states. (F) Venn diagram showing the overlap of target mRNAs from HEK293 (Mukherjee et al. 2011) and THP-1 naïve. (G) Reactome pathway analysis for the mRNAs that were uniquely bound in THP-1 cells compared to HEK293. (H) Metagene analysis showing the normalized distribution of binding sites across introns or the 3'UTR across both conditions.

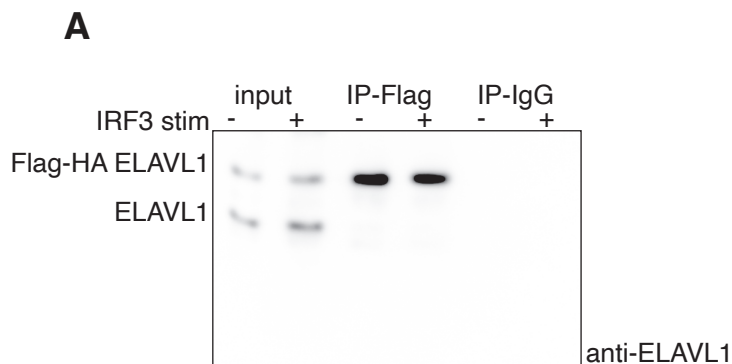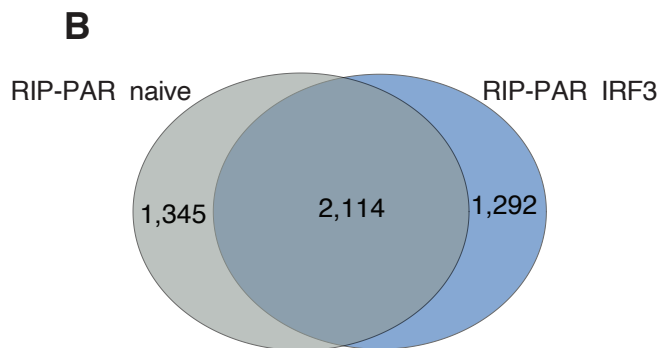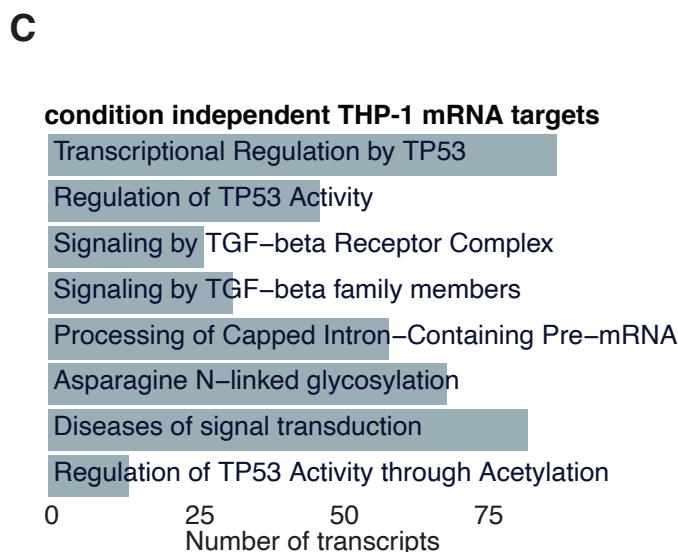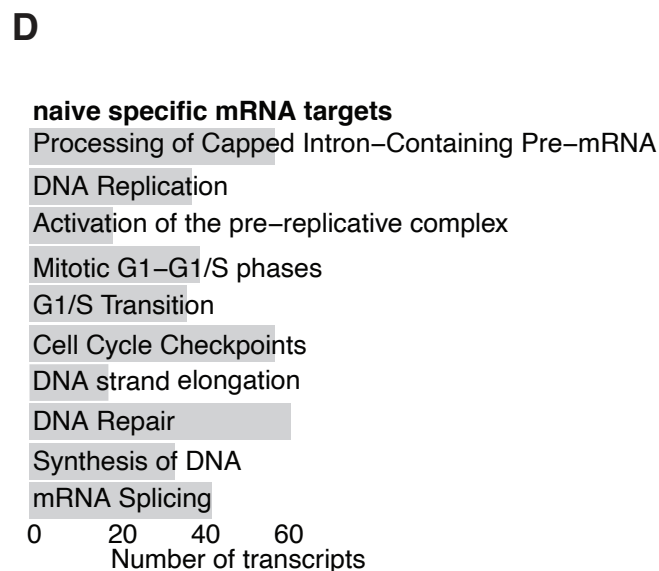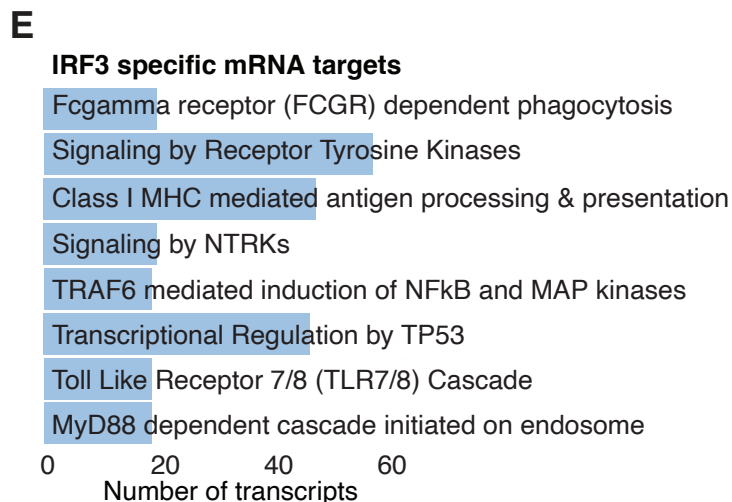

**Supplemental Figure 2: PAR-CLIP and RIP-Seq identify enriched transcripts that are condition independent or dependent , Related to Figure 2**

(A) ELAVL1 immunoblot from an IP (anti-Flag) of Flag-HA ELAVL1 in naïve and immune activated THP-1 cells. (B) Venn diagram showing the overlap between the bound (PAR-CLIP) and enriched (RIP-Seq) mRNA transcripts across conditions. (C) Bar graph of a Reactome pathway analysis for each group of transcripts that were either shared (from S2A) between the two conditions or unique bound and enriched in the naïve (D) or (E) the stimulated states.

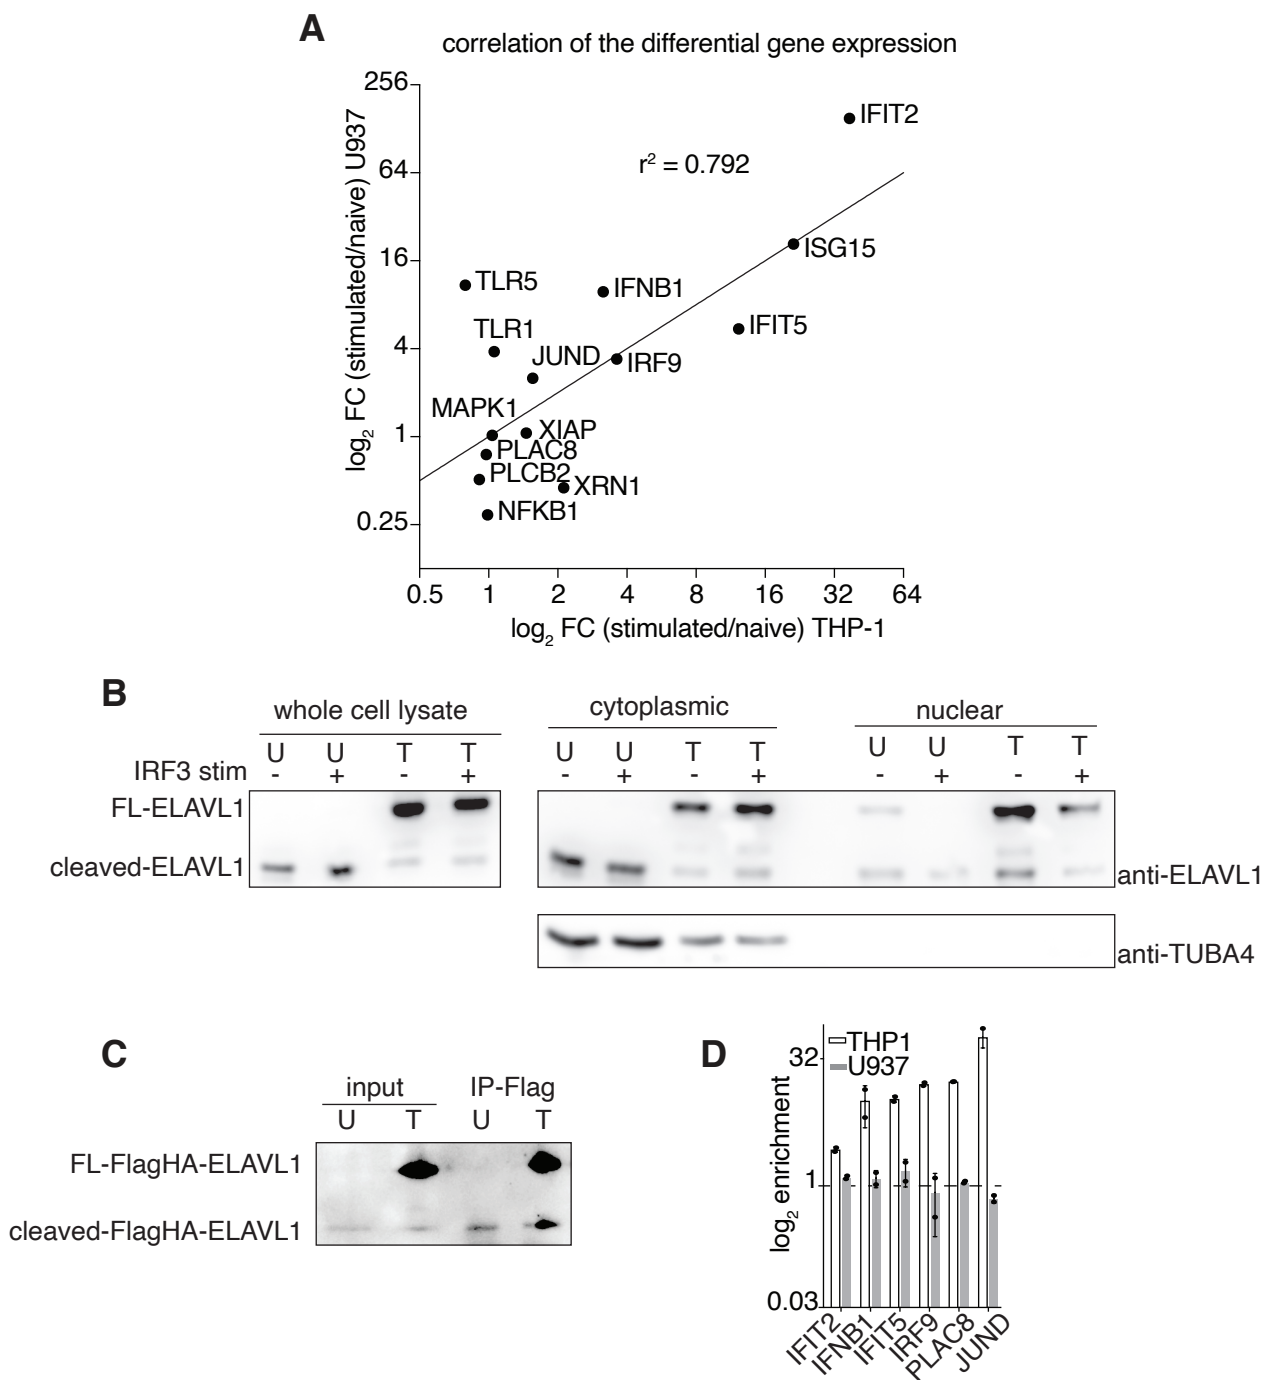

**Supplemental Figure 3: ELAVL1 in U937 cells is predominantly cleaved, Related to Figure 4**

**(A)** Correlation plot of gene expression foldchanges (activated /naïve) of the stated ISG transcripts between THP-1 and U937 cells. **(B)** Immunoblot against endogenous ELAVL1 on biochemically fractionated lysates in naïve and immune activated U937 (U) and THP-1 cells (T). The predominant form of ELAVL1 is a truncated form that is ~24 kDa, independent of the cellular state. **(C)** Anti-HA immunoblot from the input and IP (anti-Flag) of Flag-Ha ELAVL1 in U937 (U) and THP-1 cells (T). Based on molecular weight, the exogenous form of Flag-HA ELAVL1 appears cleaved in U937 compared to THP-1. **(D)** Bar graph comparing the RIP RT-qPCR enrichment levels of ISG transcripts in U937 cells and THP-1 cells. The transcripts were chosen because they were validated, highly enriched targets in THP-1 cells.

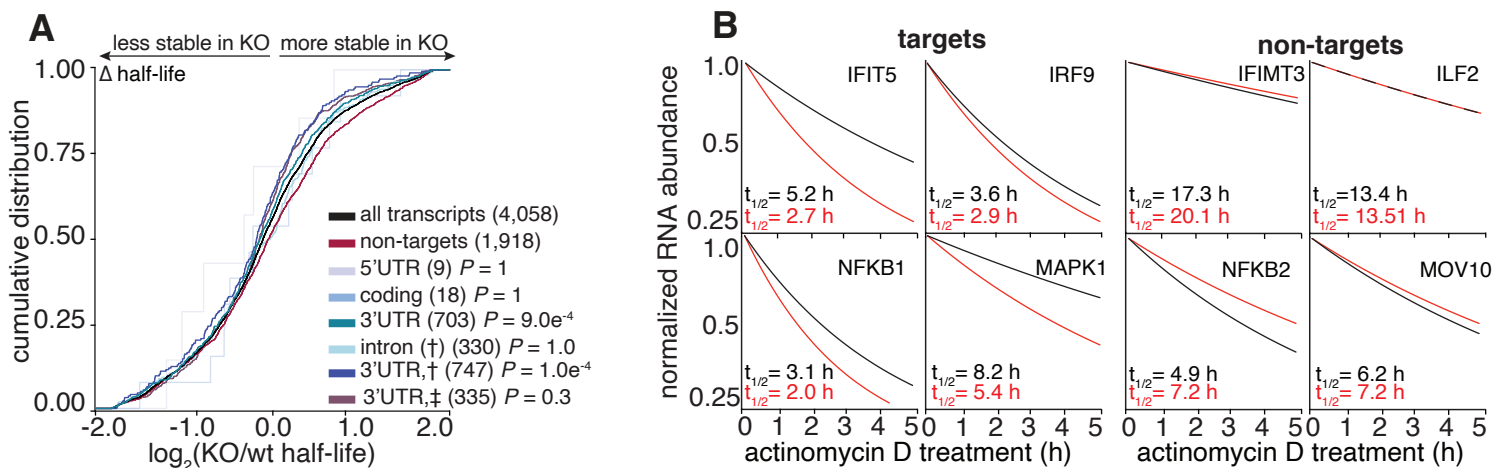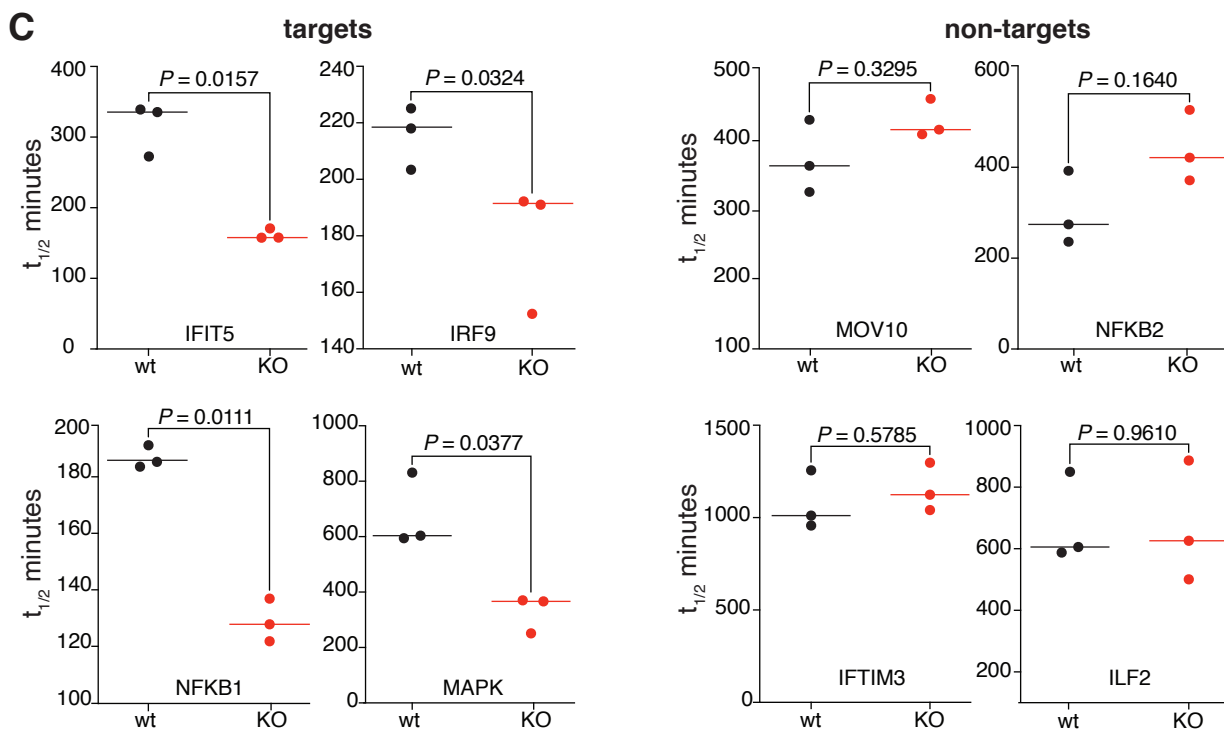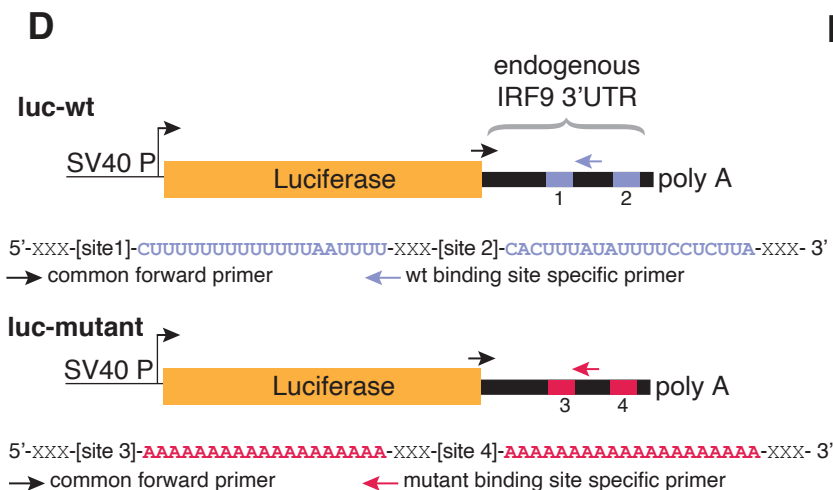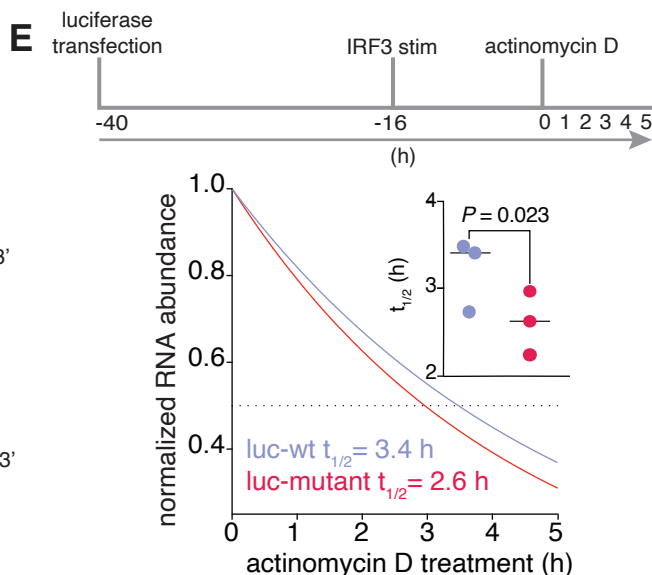



**Supplemental Figure 4: KO determines transcripts whose half-lives are dependent on the presence of ELAVL1, Related to Figure 6**

(A) Cumulative distribution plot of the  $\log_2$  foldchange (KO/wt) in half-life showing the group of transcripts whose half-lives are most affected by the loss of ELAVL1. (B) The calculated RNA half-lives and stability plots of transcripts indicated. RNA half-lives were measured using actinomycin D and RT-qPCR. (C) Pairwise comparisons of the RNA half-lives in the presence or absence of ELAVL1 for either non-target or target transcripts. (D) To test if an exogenous transcript can be stabilized in an ELAVL1 site-dependent manner, we constructed two gene reporters from the luciferase ORF and wt *IRF9* 3'UTR or mutant *IRF9* 3'UTR. Schematic shows luciferase ORF with either the wt *IRF9* 3'UTR or the mutant. (E) Schematic of luciferase reporter experiment. RNA-stability profiles and a pairwise comparison of the half-lives of an exogenous gene (ORF of luciferase) expressed with either the wt or mutant 3'UTR *IRF9*.

## **SUPPLEMENTAL FIGURE LEGENDS**

**Supplemental Figure 1. PAR-CLIP identifies and maps the cell-type-specific and condition-specific binding sites of ELAVL1, Related to Figure 1**

**Supplemental Figure 2. PAR-CLIP and RIP-Seq identify enriched transcripts that are condition independent or dependent, Related to Figure 2**

**Supplemental Figure 3. ELAVL1 in U973 cells is predominantly cleaved, Related to Figure to Figure 4**

**Supplemental Figure 4. KO determines transcripts whose half-lives are dependent on the presence of ELAVL1, Related to Figure 6**

## **SUPPLEMENTAL TABLE LEGENDS**

**Table S1. RNA-Seq counts table and DeSeq2 differential expression table comparing stimulated and naïve THP-1 gene expression, Related to Figure 1**

**Table S2. Summary table for PARalyzer output, Related to Figure 1**

**Table S3. Transcript level table with combined RIP-Seq, RNA-Seq and PAR-CLIP datasets, Related to Figure 2**

**Table S4. Cluster level tables with combined RIP-Seq, RNA-Seq and PAR-CLIP data, Related to Figure 2**

**Table S5. Reactome pathway analysis of condition dependent and independent enriched targets of THP-1, Related to Figure 3**

**Table S6. SLAM-Seq half-life data, Related to Figure 5**

**Table S7. Reactome pathway analysis of the functional targets of ELAVL1, Related to Figure 7**

**Table S8. The Primers and guide RNAs Used in this Study, Related to the STAR Methods**
